# Supplementary material for: Modulation of the electronic structure and thermoelectric properties of orthorhombic and cubic SnSe by AgBiSe2 alloying
Source: Royal Society of Chemistry journal article supplement (doi:10.1039/d1sc03696c), 2021-01-01
Supplement: d1sc03696c1.pdf [file d1sc03696c1.pdf]

## Modulation of Electronic Structure and Thermoelectric Properties of Orthorhombic and Cubic SnSe by AgBiSe<sub>2</sub> Alloying

Sushmita Chandra<sup>1,4</sup>, Raagya Arora<sup>2,3</sup>, Umesh V. Waghmare<sup>3,4</sup> and Kanishka Biswas<sup>\*,1,4</sup>

<sup>1</sup>New Chemistry Unit, <sup>2</sup>Chemistry and Physics of Materials Unit and <sup>3</sup>Theoretical Sciences Unit, <sup>4</sup>School of Advanced Materials and International Centre for Materials, Jawaharlal Nehru Centre for Advanced Scientific Research (JNCASR), Jakkur P.O., Bangalore 560064, India

\*Email: kanishka@jncasr.ac.in

### METHODS

**Reagents.** The high purity elements utilized for the synthesis of (SnSe)<sub>1-x</sub>(AgBiSe<sub>2</sub>)<sub>x</sub> (0.00 ≤ x ≤ 1.00) samples are tin (Alfa Aesar 99.99+ %), silver (Ag, Aldrich 99.999%), bismuth (Alfa Aesar 99.9999%), and selenium (Se, Alfa Aesar 99.9999%).

**Synthesis.** Polycrystalline (SnSe)<sub>1-x</sub>(AgBiSe<sub>2</sub>)<sub>x</sub> (0.00 ≤ x ≤ 1.00) samples were synthesized by combining stoichiometric ratios of elemental Ag, Bi, Sn and Se in high quality quartz tubes. The quartz tubes were maintained at a pressure of 10<sup>-5</sup> Torr and sealed under vacuum. The seal tubes were initially heated to 773 K over a period of 12 hrs, then heated again to 1223 K in next 5 hrs followed by annealing for 10 hrs and subsequently cooled to room temperature for a period of 15 hrs. The resulted ingots were crushed by using a mortar and pestle and sieved to fine powder. After that, ball-milling has been carried out at a speed of 250 rpm for 4 hrs at N<sub>2</sub> atmosphere in stainless-steel containers using a planetary Ball Mill (FRITSCH PULVERISETTE 7, Germany).

**Spark plasma sintering (SPS).** SPS was done using a SPS211-LX (Dr. Sinter Lab) instrument. The finely powdered samples were sintered to prepare a cylinder (10 mm × 8 mm) using graphite dies at 40 MPa pressure and 450 °C temperature. The samples were cut and polished

in different directions to measure the anisotropic electrical and thermal transport properties of  $(\text{SnSe})_{1-x}(\text{AgBiSe}_2)_x$  ( $0.00 \leq x \leq 0.80$ ).

**Powder X-ray diffraction.** Room temperature powder X-ray diffraction for all the samples were recorded using a  $\text{Cu K}_\alpha$  ( $\lambda = 1.5406 \text{ \AA}$ ) radiation on a Bruker D8 Diffractometer. Rietveld refinement of the PXRD pattern was performed using FULLPROF software.

**Field emission scanning electron microscopy (FESEM) in back-scattered electron (BSE) mode.** FESEM-BSE images were taken using ZEISS Gemini SEM – Field Emission Scanning Electron Microscope.

**Band gap measurement.** To estimate optical band gap of the as-synthesized specimens of  $(\text{SnSe})_{1-x}(\text{AgBiSe}_2)_x$  ( $0.00 \leq x \leq 1.00$ ), diffuse reflectance measurements were carried out with finely grounded powder at room temperature using a Perkin-Elmer Lambda 900 UV/Vis/near-IR spectrometer in reflectance mode ( $\lambda = 2500\text{-}250 \text{ nm}$ ) and FT-IR Bruker IFS 66V/S spectrometer ( $\lambda = 4000\text{-}400 \text{ cm}^{-1}$ ), respectively. Absorption ( $\alpha/\lambda$ ) data were calculated from the reflectance data using Kubelka-Munk equation:  $\alpha/\lambda = (1-R)^2/(2R)$ , where  $R$  is the reflectance,  $\alpha$  and  $\lambda$  are respectively the absorption and scattering coefficients. The energy band gap was then determined from  $\alpha/\lambda$  vs.  $E$  (eV) plot.

**Electrical transport.** Electrical conductivity and Seebeck coefficients were measured simultaneously under helium atmosphere from room temperature to 850 K on a ULVAC-RIKO ZEM-3 instrument system. The SPS processed sample were cut and polished in a rectangular shape with the dimensions of  $\sim 2 \times 2 \times 8 \text{ mm}^3$  to carry out the measurements. Electrical and thermal transport were measured in same direction.

**Hall measurement.** For determining the carrier concentrations, Hall measurements were carried out on the same rectangular specimens used for electrical transport measurement in four-contact geometry up to a magnetic field of 0.57 T at room-temperature using custom-built equipment developed by Excel Instruments.

**Thermal transport.** Temperature dependent thermal diffusivity ( $D$ ) was evaluated using a laser flash diffusivity technique in a Netzsch LFA-457 instrument. In addition, temperature dependent heat capacity was also measured in the same instrument by using a standard pyroceram (Fig. S12). Next, the total thermal conductivity ( $\kappa$ ) was derived using the formula,  $\kappa = D.C_p.\rho$ , where  $\rho$  is density of the sample and the experimentally determined density was found to be  $\sim 97\%$  of the theoretical density. Further, the electrical thermal conductivity,  $\kappa_{ele}$  were derived using Wiedemann-Franz Law,  $\kappa_{ele} = L\sigma T$ , where  $L$  denotes the Lorenz number which was estimated by fitting the temperature dependent Seebeck data<sup>1-3</sup> and provided in Fig. S13.

**Computational details.** Our first-principles calculations within density functional theory (DFT) were performed with QUANTUM ESPRESSO Package (QE) and projector augmented wave (PAW) potentials.<sup>4</sup> Electronic exchange and correlation energy was treated within a generalized gradient approximated (GGA)<sup>5</sup> functional with Perdew, Burke, and Ernzerhof (PBE) parametrization.<sup>6</sup>

Electronic wave functions and charge density were represented using plane wave basis sets truncated at cut-off energies of 45 Ry and 360 Ry respectively. The discontinuity in occupation numbers of electronic states was smeared with broadening temperature of  $k_B T = 0.003$  Ry in a Fermi-Dirac distribution function. We determined electronic structure of  $(\text{SnSe})_{1-x}(\text{AgBiSe}_2)_x$  in crystal structures with optimized (minimum energy) lattice parameters. At ambient conditions, SnSe stabilizes in the orthorhombic  $Pnma$  phase containing eight atoms in the periodic unit cell. Integrations over its Brillouin Zone (BZ) were sampled on a uniform  $8 \times 8 \times 8$  mesh of k-points. Electronic spectrum was determined at Bloch vectors along high symmetry lines ( $X - \Gamma - Y - P - \Gamma - A - Z - \Gamma - T$ ) in the BZS. Our optimized lattice parameters for pristine SnSe in the orthorhombic structure ( $Pnma$ ) are  $a = 11.77 \text{ \AA}$ ,  $b = 4.22 \text{ \AA}$ ,  $c = 4.53 \text{ \AA}$ , which are within the typical GGA errors of experimental lattice parameters ( $a = 11.57 \text{ \AA}$ ,  $b$

= 4.19 Å, c = 4.46 Å). The cubic phase of  $(\text{SnSe})_{0.67}(\text{AgBiSe}_2)_{0.33}$  was simulated using a  $\sqrt{2} \times \sqrt{2} \times 1$  supercell of conventional  $Fm\bar{3}m$  structure containing 16 atoms. Our estimates of lattice parameters of  $(\text{SnSe})_{0.67}(\text{AgBiSe}_2)_{0.33}$  in this structure ( $\sqrt{2} \times \sqrt{2} \times 1$  supercell) are  $a = 8.43 \text{ \AA}$ ,  $b = 8.43 \text{ \AA}$ ,  $c = 5.96 \text{ \AA}$ , which are within the typical GGA errors of experimental values of  $a = 8.36 \text{ \AA}$ ,  $b = 8.36 \text{ \AA}$ ,  $c = 5.91 \text{ \AA}$ . Electronic spectrum was determined at Bloch vectors along high symmetry lines ( $\Gamma - X - M - \Gamma - Z - R - A - Z - X - R - M - A$ ) in the BZ of its tetragonal unit by including the spin-orbit coupling (SOC) in calculations with fully relativistic potentials.<sup>7</sup>

The special quasirandom structures (SQS) of  $(\text{SnSe})_{0.67}(\text{AgBiSe}_2)_{0.33}$  in the cubic phase and of  $(\text{SnSe})_{0.8}(\text{AgBiSe}_2)_{0.2}$  in the orthorhombic phase were generated using the Monte Carlo SQS tool in the Alloy Theoretical Automated Toolkit (ATAT).<sup>8</sup> Our estimates of lattice parameters of the cubic structure of  $(\text{SnSe})_{0.67}(\text{AgBiSe}_2)_{0.33}$  are  $a = b = c = 5.98 \text{ \AA}$ , and of orthorhombic  $(\text{SnSe})_{0.8}(\text{AgBiSe}_2)_{0.2}$  are  $a = 12.05 \text{ \AA}$ ,  $b = 4.26 \text{ \AA}$  and  $c = 4.52 \text{ \AA}$ . To determine the bulk electronic topology of cubic SnSe, we used Z2PACKcode<sup>9</sup> to calculate the  $Z_2$  topological invariants and mirror Chern number ( $n_M$ ). This code uses hybrid Wannier functions<sup>10,11</sup> and employs the ideas of time-reversal polarization in determination of the  $Z_2$  invariants.

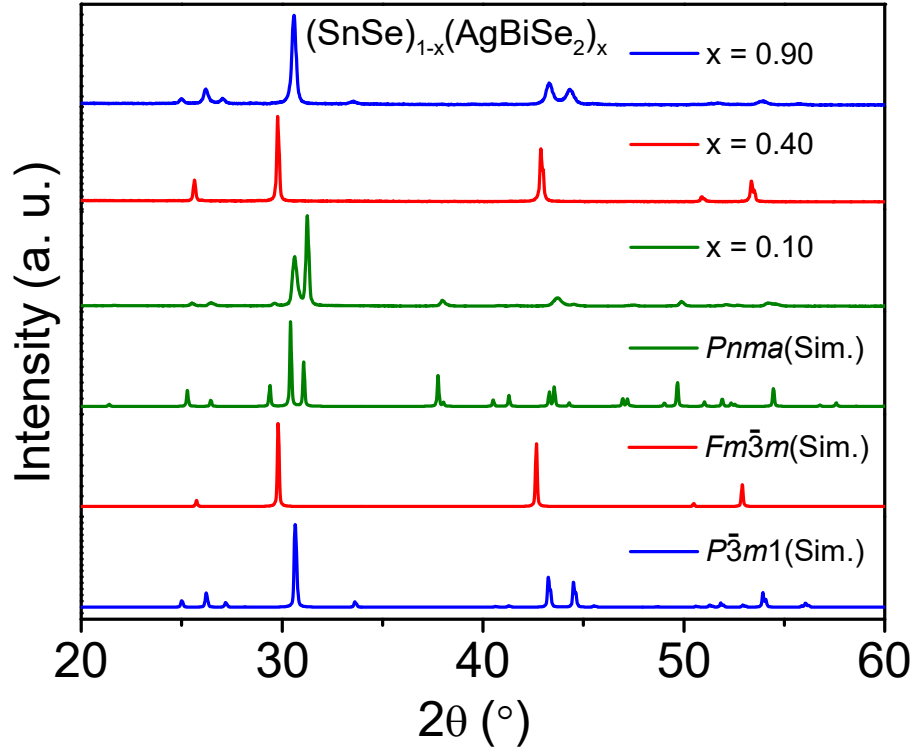

**Fig. S1.** PXRD patterns of polycrystalline  $(\text{SnSe})_{1-x}(\text{AgBiSe}_2)_x$  samples where the composition ranging in between  $0.00 \leq x < 0.28$  are orthorhombic,  $0.30 \leq x \leq 0.80$  are cubic and  $0.80 < x \leq 1.00$  are hexagonal.

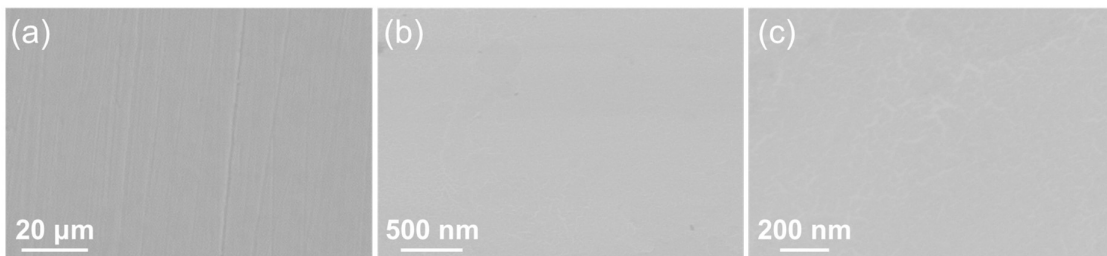

**Fig. S2.** FESEM-BSE images for ball milled and SPS processed orthorhombic  $(\text{SnSe})_{0.78}(\text{AgBiSe}_2)_{0.22}$  polycrystal with different resolution. The line like features present in (a) are due to polishing of sample.

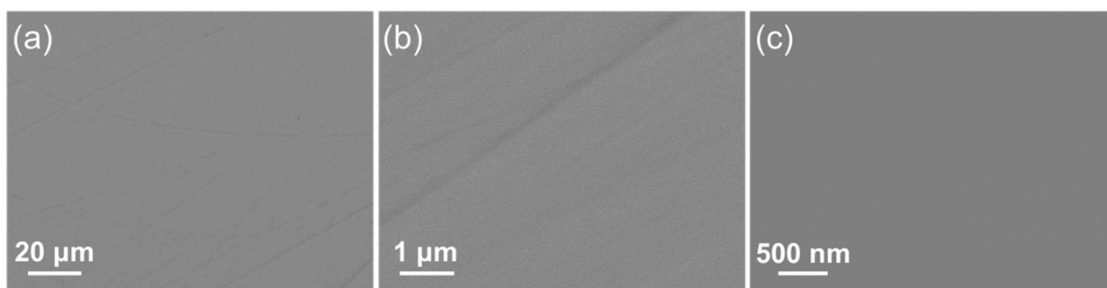

**Fig. S3.** FESEM-BSE images for ball milled and SPS processed cubic  $(\text{SnSe})_{0.70}(\text{AgBiSe}_2)_{0.30}$  polycrystal with different resolution. The line like features present in (a) & (b) are due to polishing of sample.

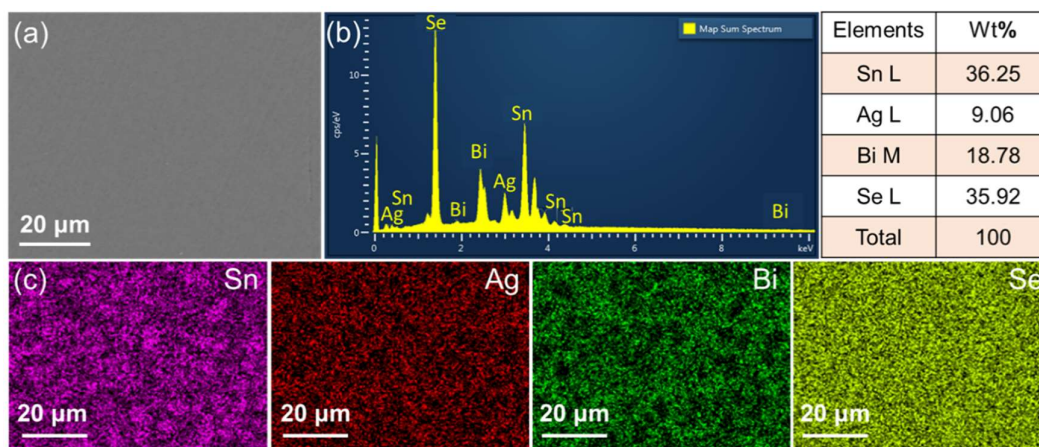

**Fig. S4.** (a) Backscattered electron images taken during FESEM for ball milled and SPS processed orthorhombic  $(\text{SnSe})_{0.78}(\text{AgBiSe}_2)_{0.22}$  polycrystal with corresponding EDAX spectra in (b). (c) EDAX elemental color mapping for Sn, Ag, Bi and Se for the area in (a).

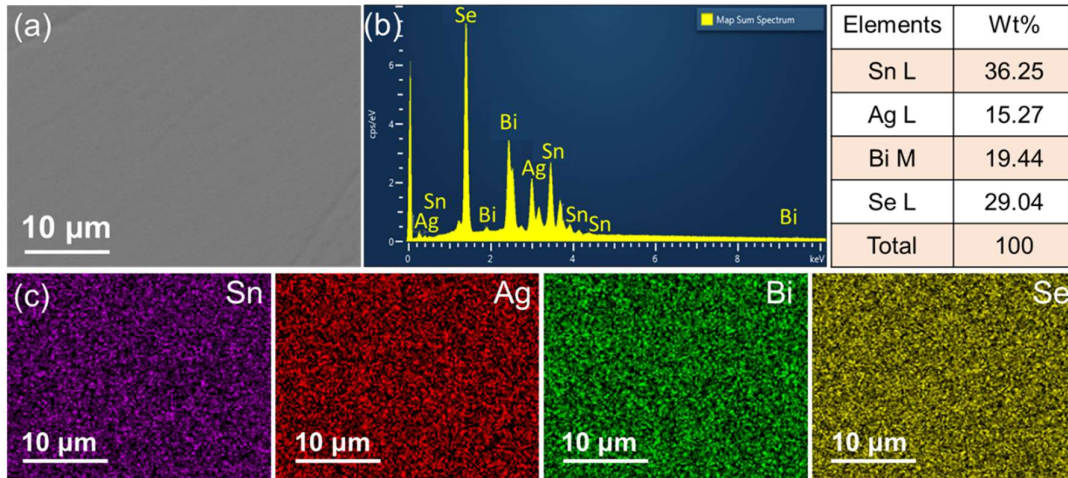

**Fig. S5.** (a) Backscattered electron images taken during FESEM for ball milled and SPS processed cubic  $(\text{SnSe})_{0.70}(\text{AgBiSe}_2)_{0.30}$  polycrystal with corresponding EDAX spectra in (b). (c) EDAX elemental color mapping for Sn, Ag, Bi and Se for the area in (a).

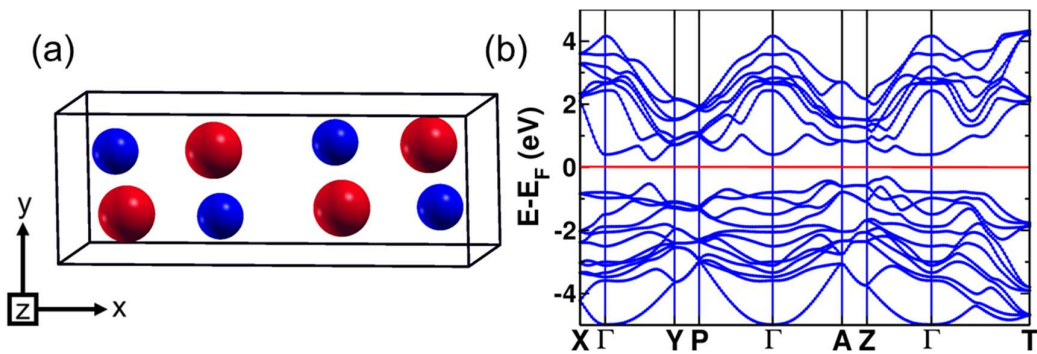

**Fig. S6.** (a) Crystal structure of SnSe in the orthorhombic unit cell with space group  $Pnma$  (Sn Red, Se blue). (b) Electronic structures of the orthorhombic ( $Pnma$ ) SnSe with the inclusion of the effect of spin-orbit coupling.

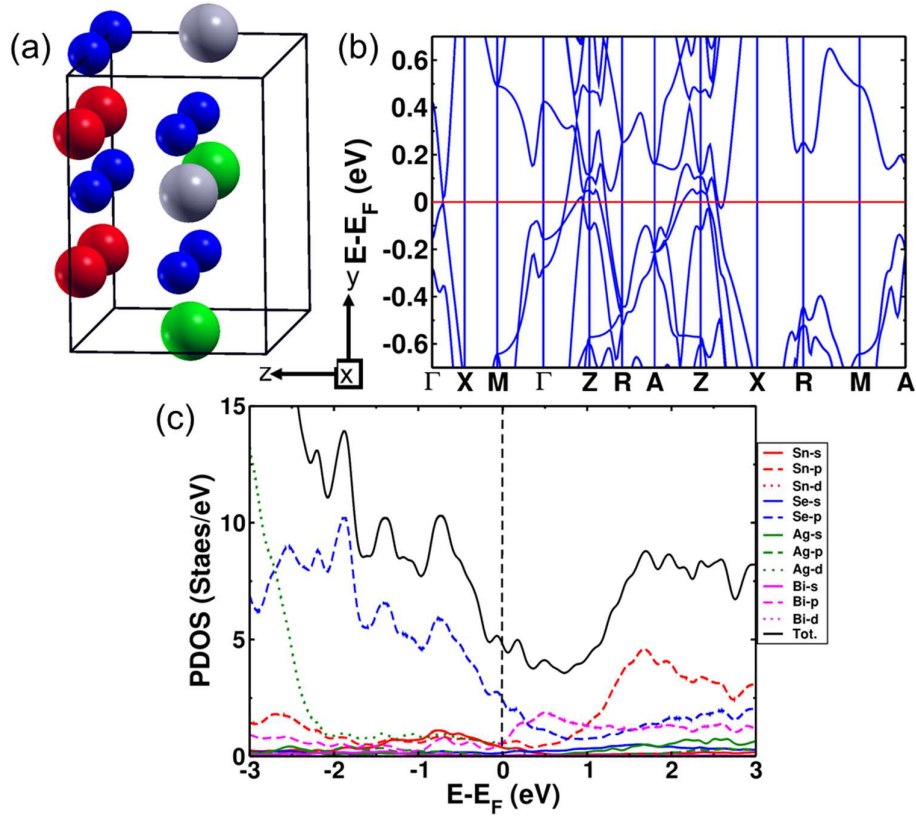

**Fig. S7.** (a) Crystal structure of disordered cubic  $(\text{SnSe})_{0.67}(\text{AgBiSe}_2)_{0.33}$  (Sn Red, Se blue, Ag green, Bi grey). (b) Electronic structures of the  $\sqrt{2} \times \sqrt{2} \times 1$  tetragonal supercell of the cubic phase of  $(\text{SnSe})_{0.67}(\text{AgBiSe}_2)_{0.33}$  with the inclusion of the effect of spin-orbit coupling. (c) Electronic density of states (DOS) and projected density of states (PDOS) of cubic  $(\text{SnSe})_{0.67}(\text{AgBiSe}_2)_{0.33}$ .

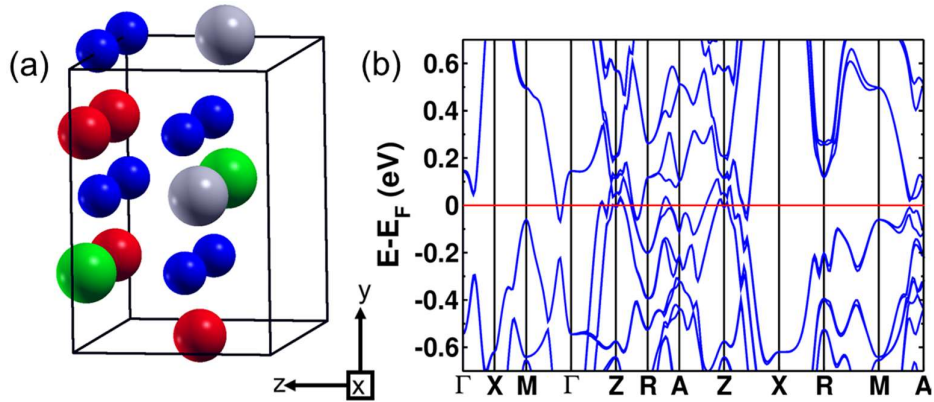

**Fig. S8.** (a) Crystal structure of lower-symmetric disordered cubic  $(\text{SnSe})_{0.67}(\text{AgBiSe}_2)_{0.33}$  (Sn Red, Se blue, Ag green, Bi grey) obtained by interchanging a pair of Sn and Ag atoms in Fig. S3a. (b) Electronic structure of the second configuration of  $\sqrt{2} \times \sqrt{2} \times 1$  tetragonal supercell of cubic structure of  $(\text{SnSe})_{0.67}(\text{AgBiSe}_2)_{0.33}$  with the inclusion of the effect of spin-orbit coupling.



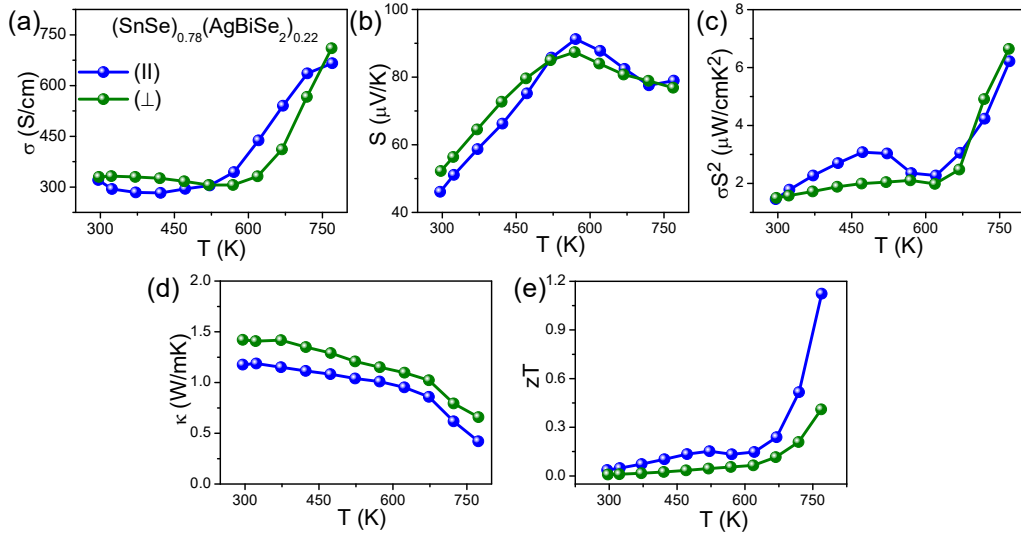

**Fig. S9.** Temperature dependent (a) electrical conductivity ( $\sigma$ ), (b) Seebeck coefficient ( $S$ ), (c) power factor ( $S^2\sigma$ ), (d) total thermal conductivity ( $\kappa$ ), and (e) thermoelectric figure of merit ( $zT$ ) of ball milled and SPS processed orthorhombic  $(\text{SnSe})_{0.78}(\text{AgBiSe}_2)_{0.22}$  sample measured along both parallel and perpendicular to SPS pressing directions.

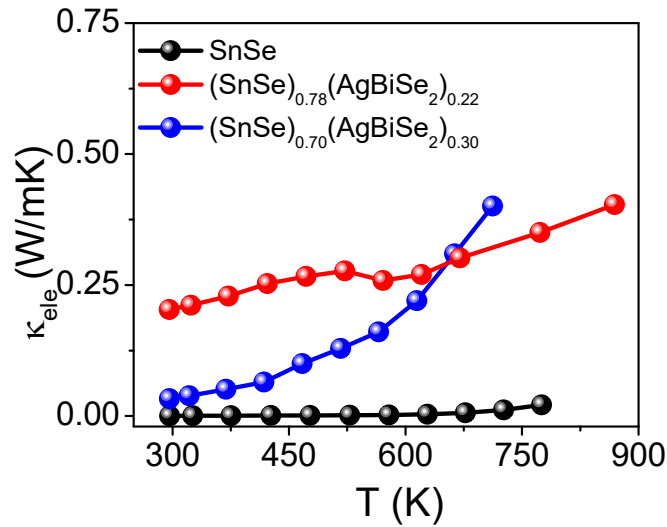

**Fig. S10.** Temperature dependent electrical thermal conductivity ( $\kappa_{ele}$ ) of ball-milled polycrystalline  $(\text{SnSe})_{1-x}(\text{AgBiSe}_2)_x$  (where,  $x = 0, 0.22$  are orthorhombic and  $x = 0.30$  is cubic in nature) measured along parallel to the SPS pressing direction.

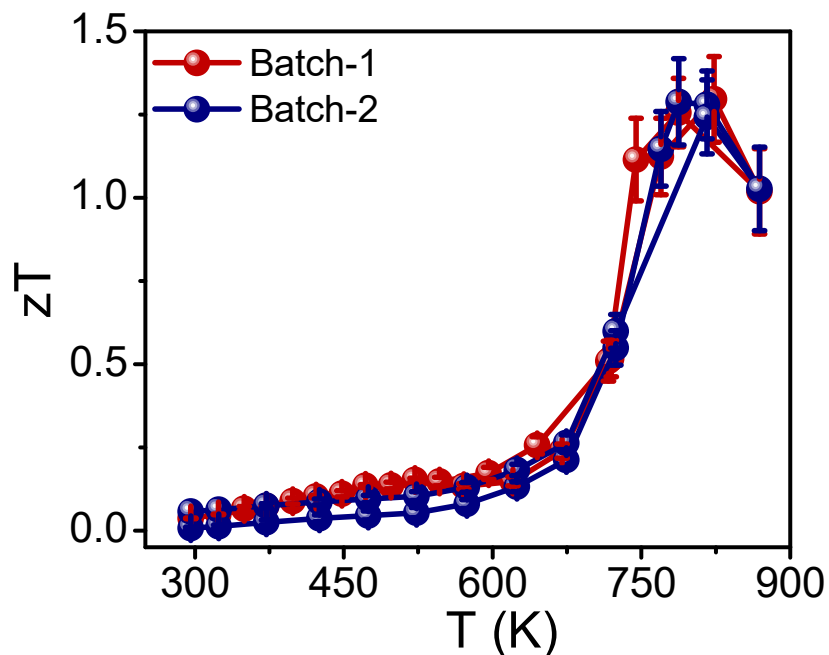

**Fig. S11.** The reversibility and reproducibility of the thermoelectric figure of merit of the SPS processed ball milled orthorhombic  $(\text{SnSe})_{0.78}(\text{AgBiSe}_2)_{0.22}$  sample measured for different batches (synthesized separately) with the heating cooling cycles. The  $zT$  is measured along the parallel to SPS pressing direction.

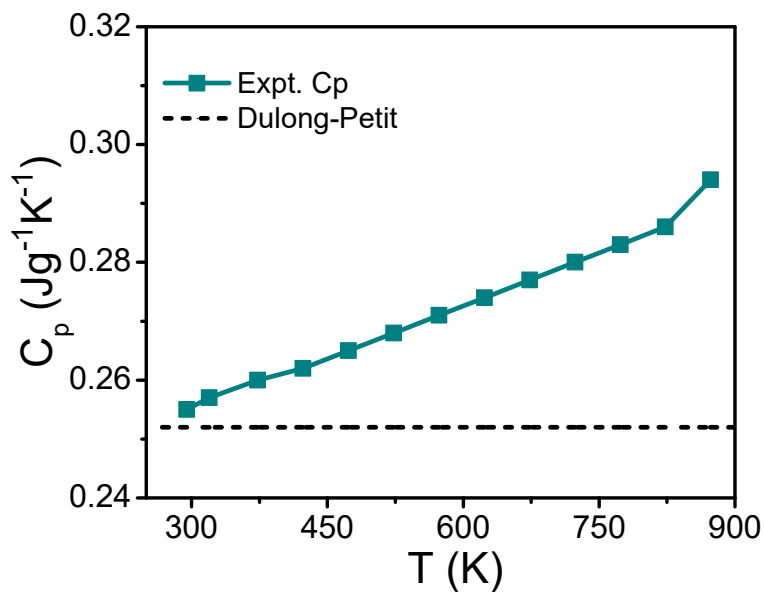

**Fig. S12.** Typical heat capacity ( $C_p$ ) of polycrystalline  $(\text{SnSe})_{1-x}(\text{AgBiSe}_2)_x$  samples along with the Dulong-Petit  $C_p$  value of SnSe.

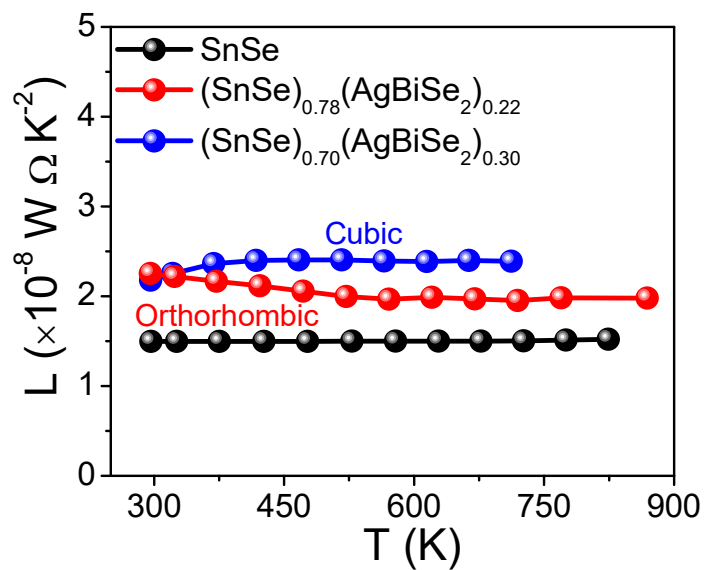

**Fig. S13.** Temperature dependent Lorenz number of ball-milled polycrystalline  $(\text{SnSe})_{1-x}(\text{AgBiSe}_2)_x$  (where,  $x = 0, 0.22$  are orthorhombic and  $x = 0.30$  is cubic in nature) along parallel to the SPS pressing direction.

**Table S1. Structural parameters of Rietveld refinement for orthorhombic  $(\text{SnSe})_{0.78}(\text{AgBiSe}_2)_{0.22}$  sample.**

Space group:  $Pnma$ ;  $a = 11.50 \text{ \AA}$ ,  $b = 4.15 \text{ \AA}$ ,  $c = 4.44 \text{ \AA}$ ,  $\alpha = \beta = \gamma = 90^\circ$

| Constituent Elements | x/a       | y/b  | z/c       | $U_{\text{iso}} (\text{\AA}^2)$ | Occupancy | $\chi^2$ |
|----------------------|-----------|------|-----------|---------------------------------|-----------|----------|
| Sn                   | 0.8564(5) | 0.25 | 0.4755(4) | 0.1148(4)                       | 0.63(2)   | 2.37     |
| Ag                   | 0.8564(5) | 0.25 | 0.4755(4) | 0.1148(4)                       | 0.21(2)   |          |
| Bi                   | 0.8564(5) | 0.25 | 0.4755(4) | 0.1148(4)                       | 0.16(2)   |          |
| Se                   | 0.1181(4) | 0.25 | 0.1091(5) | 0.0380(5)                       | 1         |          |

R-factors:  $R_{\text{wp}}$ : 12.61;  $R_{\text{exp}}$ : 8.19

**Table S2. Structural parameters of Rietveld refinement for cubic (SnSe)<sub>0.70</sub>(AgBiSe<sub>2</sub>)<sub>0.30</sub> sample.**

Space group:  $Fm\bar{3}m$ ;  $a = b = c = 5.8819 \text{ \AA}$ ,  $\alpha = \beta = \gamma = 90^\circ$

| Constituent Elements | x/a | y/b | z/c | $U_{\text{iso}} (\text{\AA}^2)$ | Occupancy | $\chi^2$ |
|----------------------|-----|-----|-----|---------------------------------|-----------|----------|
| Sn                   | 0.0 | 0.0 | 0.0 | 0.1558(3)                       | 0.54(2)   | 4.43     |
| Ag                   | 0.0 | 0.0 | 0.0 | 0.1558(3)                       | 0.27(2)   |          |
| Bi                   | 0.0 | 0.0 | 0.0 | 0.1558(3)                       | 0.19(2)   |          |
| Se                   | 0.5 | 0.5 | 0.5 | 0.0815(4)                       | 1         |          |

R-factors:  $R_{\text{wp}}$ : 11.93;  $R_{\text{exp}}$ : 5.6

**Table S3. Charge carrier concentration and mobility of the ball milled and SPS processed polycrystalline (SnSe)<sub>1-x</sub>(AgBiSe<sub>2</sub>)<sub>x</sub> ( $x = 0, 0.22, 0.30$ ) samples.**

| Composition                                                                     | Carrier concentration $n$ (cm <sup>-3</sup> ) | Carrier Mobility $\mu$ (cm <sup>2</sup> V <sup>-1</sup> s <sup>-1</sup> ) |
|---------------------------------------------------------------------------------|-----------------------------------------------|---------------------------------------------------------------------------|
| SnSe                                                                            | $8.9 \times 10^{17}$ ( <i>p</i> -type)        | 8.3                                                                       |
| (SnSe) <sub>0.78</sub> (AgBiSe <sub>2</sub> ) <sub>0.22</sub><br>(Orthorhombic) | $8.2 \times 10^{19}$ ( <i>p</i> -type)        | 20.8                                                                      |
| (SnSe) <sub>0.70</sub> (AgBiSe <sub>2</sub> ) <sub>0.30</sub><br>(Cubic)        | $6.17 \times 10^{18}$ ( <i>n</i> -type)       | 54.6                                                                      |

**Table S4. Densities of the ball milled and SPS processed polycrystalline (SnSe)<sub>1-x</sub>(AgBiSe<sub>2</sub>)<sub>x</sub> ( $x = 0, 0.22, 0.30$ ) samples.**

| Composition                                                                     | Density (gm cm <sup>-3</sup> ) |
|---------------------------------------------------------------------------------|--------------------------------|
| SnSe                                                                            | 5.99                           |
| (SnSe) <sub>0.78</sub> (AgBiSe <sub>2</sub> ) <sub>0.22</sub><br>(Orthorhombic) | 6.01                           |
| (SnSe) <sub>0.70</sub> (AgBiSe <sub>2</sub> ) <sub>0.30</sub><br>(Cubic)        | 5.93                           |

**Table S5. Comparison of  $\kappa_{lat}$  of various high performance SnSe based polycrystals.**

| Product                                                                         | $\kappa_{lat}$<br>(W m <sup>-1</sup> K <sup>-1</sup> ) | T (K)      | Reference          |
|---------------------------------------------------------------------------------|--------------------------------------------------------|------------|--------------------|
| <b>(SnSe)<sub>0.78</sub>(AgBiSe<sub>2</sub>)<sub>0.22</sub></b>                 | <b>0.19</b>                                            | <b>773</b> | <b>(This Work)</b> |
| AgSnSbSe <sub>1.5</sub> Te <sub>1.5</sub>                                       | 0.32                                                   | 723        | 12                 |
| Sn <sub>0.50</sub> (AgBi) <sub>0.25</sub> Se <sub>0.50</sub> Te <sub>0.50</sub> | 0.24                                                   | 820        | 13                 |
| (Na <sub>0.01</sub> Sn <sub>0.99</sub> Se)-5%(PbSe)                             | 0.11                                                   | 773        | 14                 |
| Sn <sub>0.40</sub> (AgBi) <sub>0.30</sub> Se                                    | 0.45                                                   | 842        | 15                 |
| K <sub>0.01</sub> Sn <sub>0.99</sub> Se                                         | 0.20                                                   | 773        | 16                 |
| Ag <sub>0.01</sub> Sn <sub>0.99</sub> Se <sub>0.85</sub> Se <sub>0.15</sub>     | 0.11                                                   | 825        | 17                 |
| Sn <sub>0.95</sub> Se                                                           | 0.23                                                   | 873        | 18                 |
| SnSe + 1mol% PbSe                                                               | 0.15                                                   | 873        | 19                 |

## REFERENCES

- 1 A. Banik, U. S. Shenoy, S. Saha, U. V Waghmare and K. Biswas, *J. Am. Chem. Soc.*, 2016, **138**, 13068–13075.
- 2 D. Sarkar, T. Ghosh, A. Banik, S. Roychowdhury, D. Sanyal and K. Biswas, *Angew. Chem. Int. Ed.*, 2020, **59**, 11115–11122.
- 3 S. Perumal, S. Roychowdhury, D. S. Negi, R. Datta and K. Biswas, *Chem. Mater.*, 2015, **27**, 7171–7178.
- 4 G. Kresse and D. Joubert, *Phys. Rev. B*, 1999, **59**, 1758–1775.
- 5 X. Hua, X. Chen and W. A. Goddard, *Phys. Rev. B*, 1997, **55**, 16103–16109.
- 6 J. P. Perdew, K. Burke and M. Ernzerhof, *Phys. Rev. Lett.*, 1996, **77**, 3865–3868.
- 7 A. Dal Corso, *Comput. Mater. Sci.*, 2014, **95**, 337–350.
- 8 A. van de Walle, P. Tiwary, M. de Jong, D. L. Olmsted, M. Asta, A. Dick, D. Shin, Y. Wang, L.-Q. Chen and Z.-K. Liu, *Calphad*, 2013, **42**, 13–18.
- 9 D. Gresch, G. Autès, O. V. Yazyev, M. Troyer, D. Vanderbilt, B. A. Bernevig and A. A. Soluyanov, *Phys. Rev. B*, 2017, **95**, 075146.
- 10 A. A. Soluyanov and D. Vanderbilt, *Phys. Rev. B*, 2011, **83**, 235401.
- 11 J. Bhattacharjee and U. V. Waghmare, *Phys. Rev. B*, 2005, **71**, 045106.
- 12 Y. Luo, S. Hao, S. Cai, T. J. Slade, Z. Z. Luo, V. P. Dravid, C. Wolverton, Q. Yan and M. G. Kanatzidis, *J. Am. Chem. Soc.*, 2020, **142**, 15187–15198.
- 13 H. Wang, H. Hu, N. Man, C. Xiong, Y. Xiao, X. Tan, G. Liu and J. Jiang, *Mater. Today Phys.*, 2021, **16**, 100298.
- 14 Y. K. Lee, Z. Luo, S. P. Cho, M. G. Kanatzidis and I. Chung, *Joule*, 2019, **3**, 719–731.
- 15 H. X. Wang, L. S. Mao, X. J. Tan, G. Q. Liu, J. T. Xu, H. Z. Shao, H. Y. Hu and J. Jiang, *Nano Energy*, 2018, **51**, 649–655.
- 16 Y. X. Chen, Z. H. Ge, M. Yin, D. Feng, X. Q. Huang, W. Zhao and J. He, *Adv. Funct. Mater.*, 2016, **26**, 6836–6845.
- 17 C. C. Lin, R. Lydia, J. H. Yun, H. S. Lee and J. S. Rhyee, *Chem. Mater.*, 2017, **29**, 5344–5352.
- 18 W. Wei, C. Chang, T. Yang, J. Liu, H. Tang, J. Zhang, Y. Li, F. Xu, Z. Zhang, J. F. Li and G. Tang, *J. Am. Chem. Soc.*, 2018, **140**, 499–505.
- 19 G. Tang, W. Wei, J. Zhang, Y. Li, X. Wang, G. Xu, C. Chang, Z. Wang, Y. Du and L. D. Zhao, *J. Am. Chem. Soc.*, 2016, **138**, 13647–13654.
